# Supplementary material
Source: MDPI journal article supplement (https://www.mdpi.com/2079-6412/9/8/508)
Supplement: s1 [file s1]

# Supplementary Materials: Inclusion of 5-Mercapto-1-Phenyl-Tetrazole into $\beta$ -Cyclodextrin for Corrosion Protection of Copper and Bronze in Acidic Medium

Cecilia Monticelli <sup>1,\*</sup>, Giancarlo Fantin <sup>2</sup>, Graziano Di Carmine <sup>2</sup>, Federica Zanotto <sup>1</sup> and Andrea Balbo <sup>1</sup>

<sup>1</sup> Centro di Studi sulla Corrosione e Metallurgia "A. Daccò", Dipartimento di Ingegneria, Università di Ferrara, 44121 Ferrara, Italy

<sup>2</sup> Dipartimento di Scienze Chimiche e Farmaceutiche, Università di Ferrara, 44121 Ferrara, Italy

\* Correspondence: mtc@unife.it; Tel.: +39-0532-455136

## <sup>1</sup>H NMR Titration

The following two solutions were prepared in D<sub>2</sub>O: Solution A: 2.8 mM of 5-mercapto-1-phenyl-tetrazole (MPT). Solution B: 2.8 mM of MPT and 12.0 mM of  $\beta$ -cyclodextrin ( $\beta$ -CD). 0.8 mL aliquot of solution A was placed in a 5-mm NMR tube. To the NMR tube were added the amounts of solution B listed in Table S1 and spectrum recorded after each addition (Figure S1).

Table 1. Parameters related to the titration.

| <i>n</i> | $\mu\text{L } \beta\text{-CD added}$ | Molar fraction $[\beta\text{-CD}]/[\text{MPT}]$ | [MPT] | $[\beta\text{-CD}]$ |
|----------|--------------------------------------|-------------------------------------------------|-------|---------------------|
| 1        | 0                                    | 0                                               | 2,8   | 0                   |
| 2        | 80                                   | 0.39                                            | 2,8   | 1.09                |
| 3        | 160                                  | 0.71                                            | 2,8   | 1.99                |
| 4        | 240                                  | 0.98                                            | 2,8   | 2.76                |
| 5        | 320                                  | 1.21                                            | 2,8   | 3.39                |
| 6        | 520                                  | 1.68                                            | 2,8   | 4.72                |
| 7        | 720                                  | 2.02                                            | 2,8   | 5.67                |
| 8        | 920                                  | 2.29                                            | 2,8   | 6.39                |

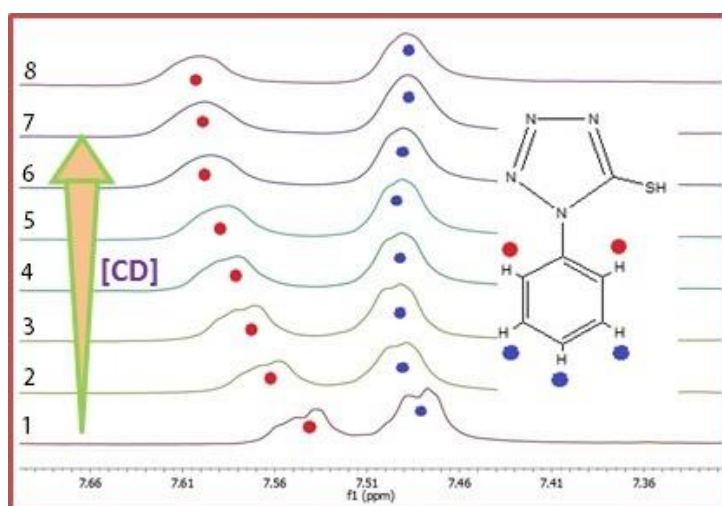

Figure S1. Variations of a portion of <sup>1</sup>H NMR spectrum (400 MHz) of MPT 2.8 mM during its titration with  $\beta$ -CD 12 mM in D<sub>2</sub>O. The molar fractions of host are reported in Table S1.

The chemical shift variation of the ortho-phenyl protons of the MPT was collected and the binding constant (as log K) was calculated by curve fitting method [1] using the commercial HypNMR2008 program [2].

## HypNMR Fitting Data Output for MPT Binding by $\beta$ -CD Calculated from Ortho-Protons

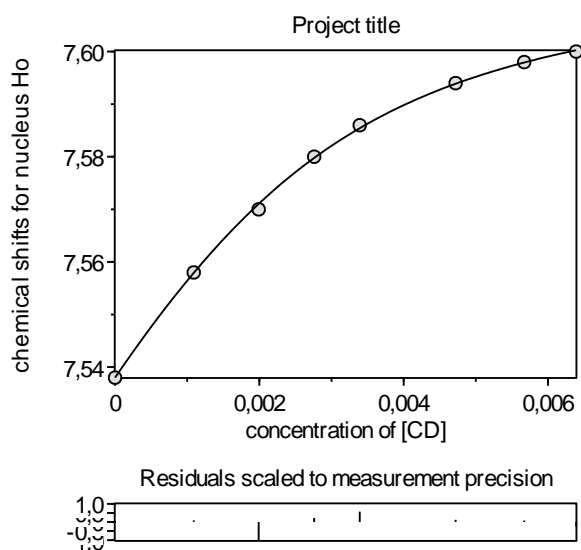

HypNMR2008

Refinement concluded at 14:11:51 on 15/02/2019

Data from C:\Users\Fantin\Desktop\INCL. CYCLODEX\Titolazione MPT\MPT + CD 22-10-18 RI-RIFATTA.HQD (modified)

Project title: MPT titration with Cyclodextrin

Converged in 4 iterations with sigma = 0,504823

|                       |        |           | standard |  |
|-----------------------|--------|-----------|----------|--|
|                       | value  | deviation | Comments |  |
| 1 log beta([CD][MPT]) | 2.9342 | 0.0383    | 2.93(4)  |  |

### DOSY Measures

Stacked plot and computational analysis of the DOSY experiments.

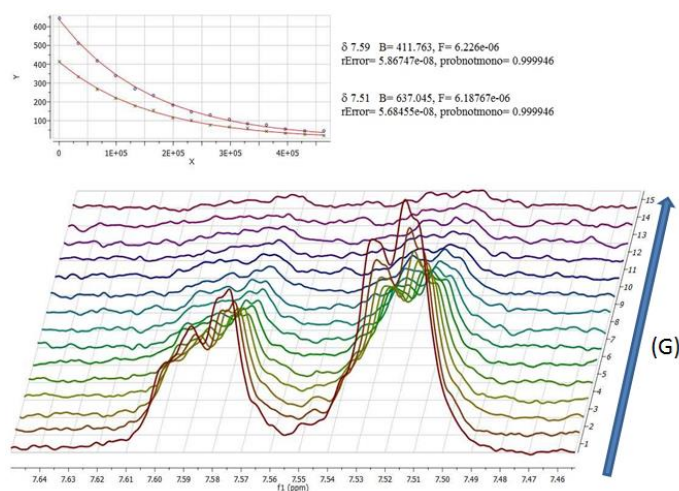

**Figure S2.** Stacked plot and computational analysis of the DOSY experiment of a sample containing MPT alone. MPT signal decays according to the gradients (G) together with the corresponding graphical analysis of the data. The diffusion coefficients are indicated with the letter F.

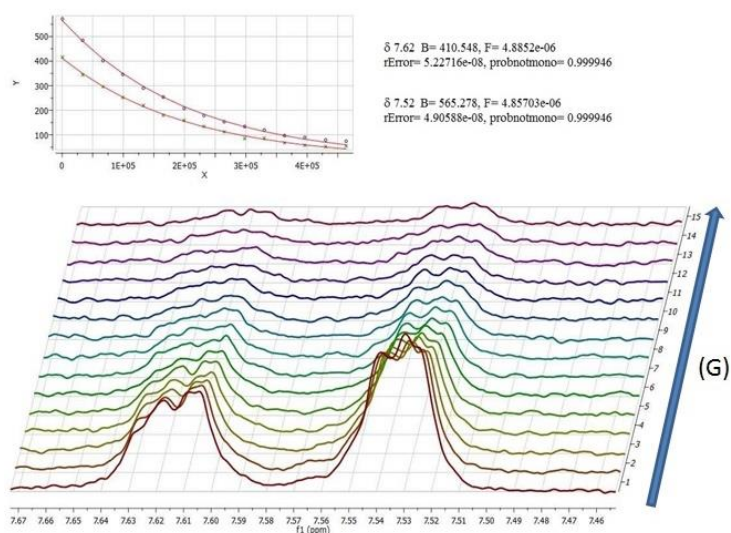

**Figure S3.** Stacked plot and computational analysis of the DOSY experiment of a sample containing MPT +  $\beta$ -CD. MPT signal decays according to the gradients (G) together with the corresponding graphical analysis of the data. The diffusion coefficients are indicated with the letter F.

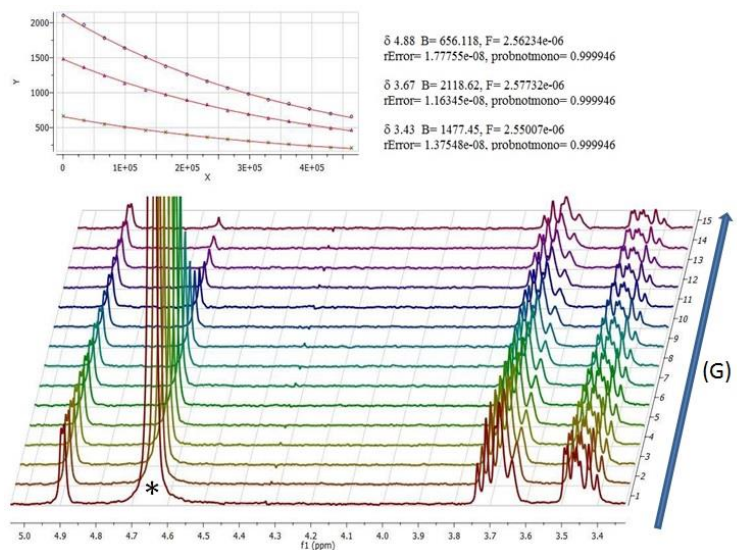

**Figure S4.** Stacked plot and computational analysis of the DOSY experiment of a sample containing MPT +  $\beta$ -CD.  $\beta$ -CD signal decays according to the gradients (G) together with the corresponding graphical analysis of the data.

The diffusion coefficients are indicated with the letter F; \* DOH signal.

## References

1. Fielding, L. Determination of Association Constants ( $K_a$ ) from Solution NMR Data. *Tetrahedron* **2000**, *34*, 6151–6170.
2. Frassinetti, C.; Ghelli, S.; Gans, P.; Sabatini, A.; Moruzzi, M.S.; Vacca, A. Nuclear magnetic resonance as a tool for determining protonation constants of natural polyprotic bases in solution. *Anal. Biochem.* **1995**, *231*, 374–382.

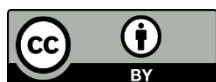

© 2019 by the authors. Submitted for possible open access publication under the terms and conditions of the Creative Commons Attribution (CC BY) license (<http://creativecommons.org/licenses/by/4.0/>).
